# Supplementary material for: Renal Function, Albuminuria, and the Risk of Cardiovascular Events After Kidney Transplantation
Source: PubMed Central journal article supplement — Transplant Direct. 2018 Sep 6;4(10):e389. doi: 10.1097/TXD.0000000000000828 (PMC6233669; doi:10.1097/txd.0000000000000828), 2018-09-06
Supplement: txd-4-e389-s001.pdf [file txd-4-e389-s001.pdf]

Figure S1. Cohort Creation

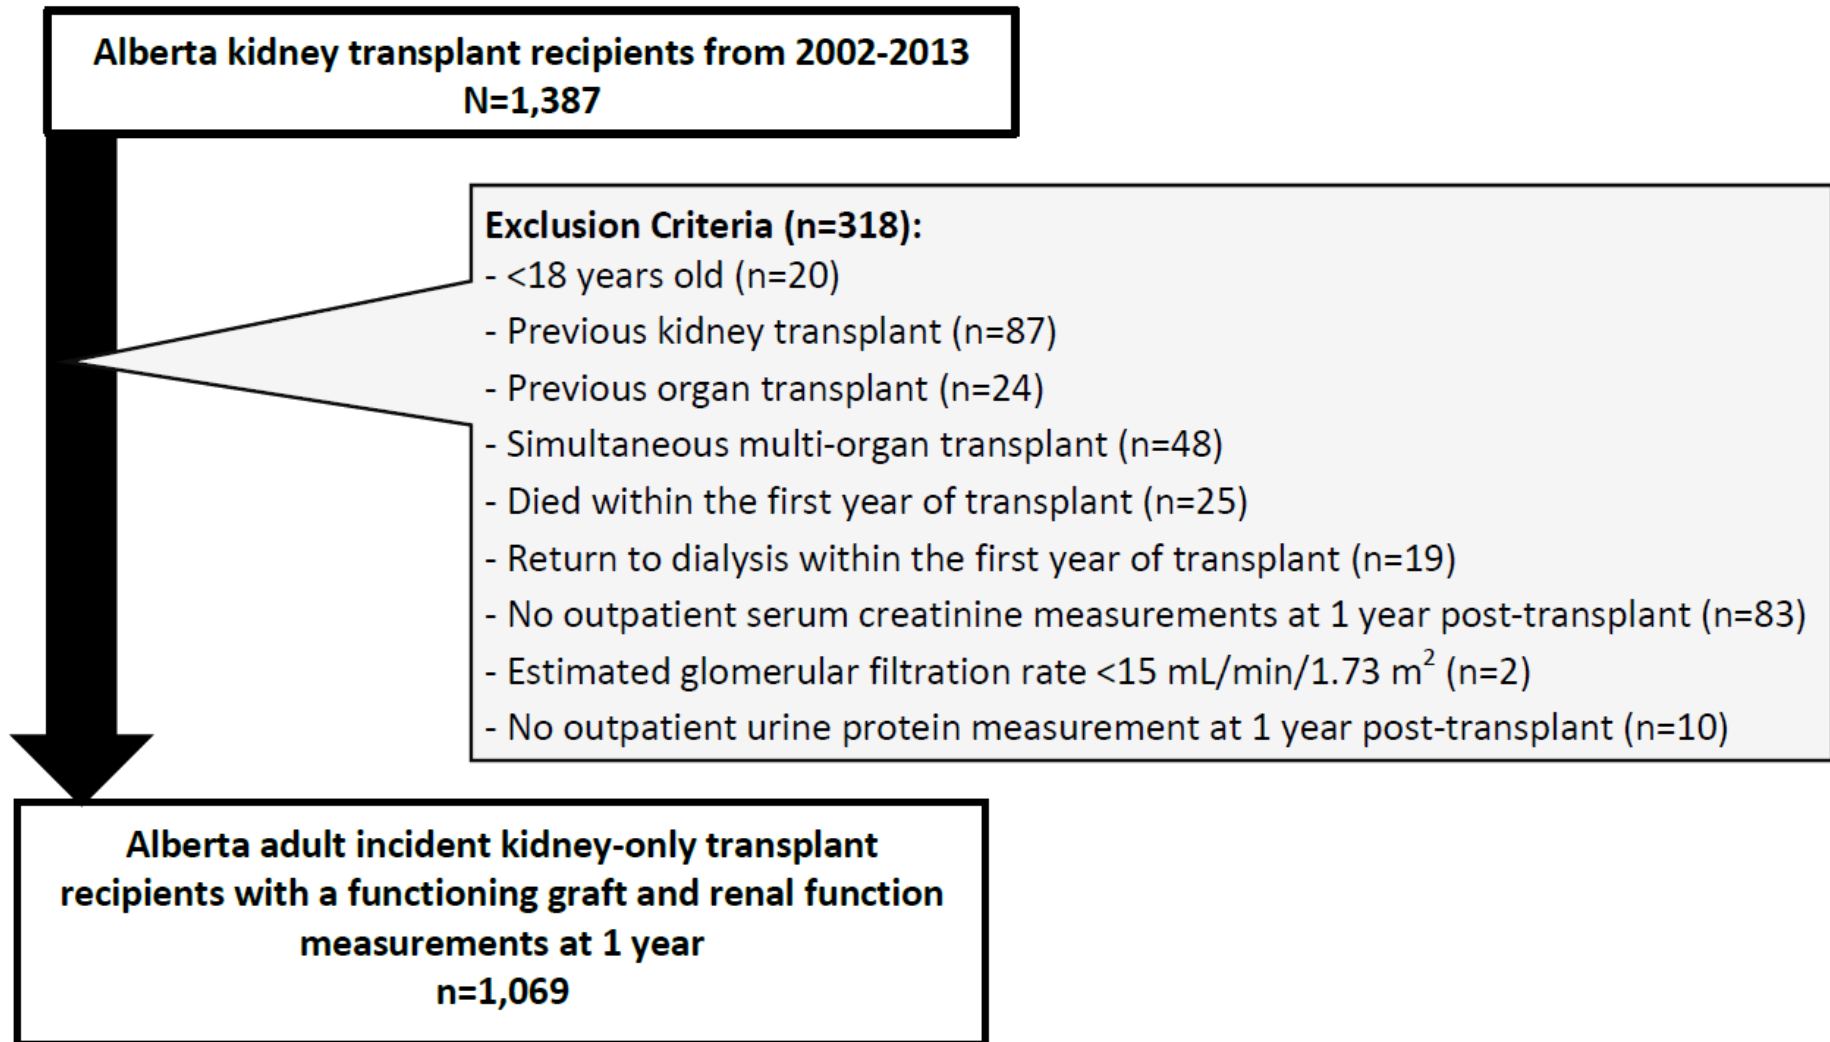

Figure S2. Study Design

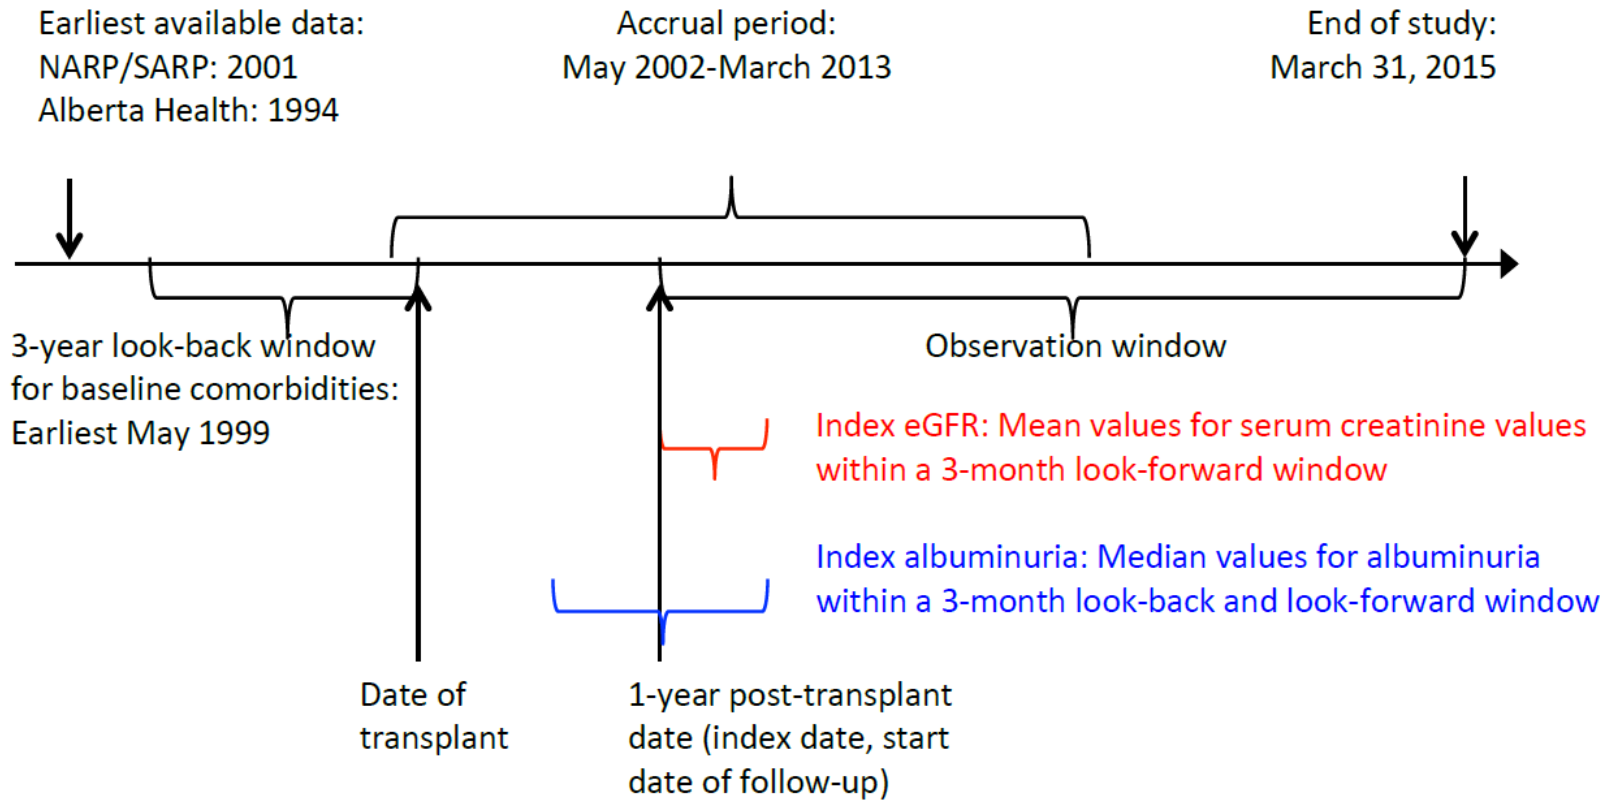

Abbreviations: eGFR, estimated glomerular filtration rate; NARP/SARP, Northern and Southern Alberta Renal Program.

**Figure S3a. Rates of Clinical Outcomes by Level of eGFR and Albuminuria (by ACR or PCR) in Kidney Transplant Recipients, per 1,000 Person-years**

| eGFR                                   | All-cause Mortality and Cardiovascular Events <sup>a</sup> (N=725) |                   |                    |                     | Death-censored Cardiovascular Events <sup>a</sup> (N=725) |                   |                   |                 |
|----------------------------------------|--------------------------------------------------------------------|-------------------|--------------------|---------------------|-----------------------------------------------------------|-------------------|-------------------|-----------------|
|                                        | Albuminuria (ACR or PCR)                                           |                   |                    |                     |                                                           |                   |                   |                 |
|                                        | Overall                                                            | Normal            | Mild               | Heavy               | Overall                                                   | Normal            | Mild              | Heavy           |
| <b>≥60 mL/min/1.73 m<sup>2</sup></b>   |                                                                    |                   |                    |                     |                                                           |                   |                   |                 |
| Events, n                              | 53                                                                 | 23                | 26                 | 4                   | 37                                                        | 18                | 17                | 2               |
| Patients, n                            | 368                                                                | 214               | 142                | 12                  | 368                                                       | 214               | 142               | 12              |
| Unadjusted                             | 29.3 (22.2, 37.4)                                                  | 21.7 (13.6, 30.9) | 37.5 (25.2, 51.8)  | 78.5 (15.9, 175.3)  | 20.5 (14.1, 27.1)                                         | 17.0 (9.4, 25.3)  | 24.6 (13.3, 36.6) | 39.2 (0, 122.3) |
| Adjusted <sup>b</sup>                  | 31.1 (23.0, 43.2)                                                  | 25.8 (16.3, 42.0) | 35.2 (24.2, 55.4)  | 69.7 (19.0, 306.8)  | 23.2 (16.5, 34.6)                                         | 20.5 (11.5, 37.9) | 26.0 (14.9, 43.6) | 33.6 (0, 228.8) |
| <b>45-59 mL/min/1.73 m<sup>2</sup></b> |                                                                    |                   |                    |                     |                                                           |                   |                   |                 |
| Events, n                              | 29                                                                 | 13                | 13                 | 3                   | 17                                                        | 8                 | 7                 | 2               |
| Patients, n                            | 216                                                                | 118               | 87                 | 11                  | 216                                                       | 118               | 87                | 11              |
| Unadjusted                             | 28.0 (18.6, 38.9)                                                  | 23.3 (12.3, 36.8) | 30.4 (14.5, 48.8)  | 61.0 (0, 176.8)     | 16.4 (9.1, 24.7)                                          | 14.3 (5.6, 25.1)  | 16.4 (6.3, 31.0)  | 40.7 (0, 128.5) |
| Adjusted <sup>b</sup>                  | 28.4 (18.0, 43.7)                                                  | 24.0 (12.4, 44.2) | 32.5 (14.9, 56.6)  | 39.9 (0, 222.8)     | 17.6 (9.0, 28.3)                                          | 15.2 (5.4, 31.3)  | 18.4 (5.4, 37.1)  | 34.5 (0, 191.5) |
| <b>30-44 mL/min/1.73 m<sup>2</sup></b> |                                                                    |                   |                    |                     |                                                           |                   |                   |                 |
| Events, n                              | 28                                                                 | 9                 | 17                 | 2                   | 18                                                        | 5                 | 12                | 1               |
| Patients, n                            | 107                                                                | 34                | 64                 | 9                   | 107                                                       | 34                | 64                | 9               |
| Unadjusted                             | 51.8 (35.7, 73.0)                                                  | 49.3 (20.3, 84.9) | 55.0 (31.9, 86.1)  | 40.9 (0, 136.9)     | 33.3 (20.0, 49.4)                                         | 27.4 (5.8, 51.3)  | 38.8 (19.7, 64.7) | 20.5 (0, 83.1)  |
| Adjusted <sup>b</sup>                  | 46.6 (31.3, 69.0)                                                  | 44.3 (21.0, 81.1) | 49.2 (28.6, 81.4)  | 47.4 (0, 141.1)     | 32.2 (19.4, 50.6)                                         | 25.5 (6.9, 52.5)  | 37.4 (19.4, 67.3) | 25.8 (0, 108.0) |
| <b>15-29 mL/min/1.73 m<sup>2</sup></b> |                                                                    |                   |                    |                     |                                                           |                   |                   |                 |
| Events, n                              | 13                                                                 | 1                 | 8                  | 4                   | 4                                                         | 0                 | 3                 | 1               |
| Patients, n                            | 34                                                                 | 5                 | 21                 | 8                   | 34                                                        | 5                 | 21                | 8               |
| Unadjusted                             | 72.2 (36.8, 115.4)                                                 | 36.9 (0, 143.9)   | 76.0 (32.6, 135.0) | 84.0 (12.5, 211.8)  | 22.2 (4.5, 51.1)                                          | 0 (0, 0)          | 28.5 (0, 69.1)    | 21.0 (0, 111.9) |
| Adjusted <sup>b</sup>                  | 53.7 (27.7, 109.0)                                                 | 19.0 (0, 110.9)   | 54.9 (17.6, 134.1) | 102.8 (16.7, 479.8) | 19.8 (3.8, 59.9)                                          | 0 (0, 0)          | 22.7 (0, 77.3)    | 31.2 (0, 285.9) |

Data is presented as rate (95% confidence interval).

<sup>a</sup> Cardiovascular event was defined as a hospitalization for myocardial infarction or ischemic stroke or a procedural code for PCI or CABG.

<sup>b</sup> Adjusted for age, sex, SES, urban residence, pre-transplant dialysis modality, dialysis duration, year of transplant, and a pre-transplant history of hypertension, diabetes mellitus, myocardial infarction, PCI or CABG surgery, heart failure, atrial fibrillation, stroke/TIA, and PVD.

For all-cause mortality and cardiovascular events and death-censored cardiovascular events, test results for linear trend were not significant across albuminuria categories. Colors represent the ranking of adjusted rates (ranked from 1 [lowest] to 12 [highest]). The categories with rank numbers 1-3 are green, 4-6 are yellow, 7-9 are orange, and 10-12 are red.<sup>1</sup> Colors reflect the KDIGO categories of risk (green: low risk; yellow: moderately increased risk; orange: high risk; red: very high risk).<sup>2</sup>

Abbreviations: CABG, coronary artery bypass graft; eGFR, estimated glomerular filtration rate; KDIGO, Kidney Disease: Improving Global Outcomes; PCI, percutaneous coronary intervention; PVD, peripheral vascular disease; SES, socio-economic status.; TIA, transient ischemic attack.

**Figure S3b. Rates of Clinical Outcomes by Level of eGFR and Albuminuria (by ACR or PCR) in Kidney Transplant Recipients, per 1,000 Person-years**

| eGFR                                   | All-cause Mortality and Heart Failure (N=725) |                  |                    |                     | Death-censored Heart Failure (N=725) |                  |                    |                 |
|----------------------------------------|-----------------------------------------------|------------------|--------------------|---------------------|--------------------------------------|------------------|--------------------|-----------------|
|                                        | Albuminuria (ACR or PCR)                      |                  |                    |                     |                                      |                  |                    |                 |
|                                        | Overall                                       | Normal           | Mild               | Heavy               | Overall                              | Normal           | Mild               | Heavy           |
| <b>≥60 mL/min/1.73 m<sup>2</sup></b>   |                                               |                  |                    |                     |                                      |                  |                    |                 |
| Events, n                              | 40                                            | 17               | 20                 | 3                   | 29                                   | 12               | 15                 | 2               |
| Patients, n                            | 368                                           | 214              | 142                | 12                  | 368                                  | 214              | 142                | 12              |
| Unadjusted                             | 21.8 (15.7, 28.6)                             | 15.5 (8.9, 23.1) | 28.8 (17.4, 42.6)  | 64.2 (0, 177.6)     | 15.8 (10.6, 21.9)                    | 11.0 (5.4, 17.5) | 21.6 (11.8, 34.2)  | 42.8 (0, 130.2) |
| Adjusted <sup>a</sup>                  | 21.0 (14.8, 30.9)                             | 17.1 (9.5, 29.2) | 23.4 (14.1, 40.8)  | 86.9 (0, 307.7)     | 15.4 (9.9, 25.3)                     | 11.6 (5.0, 25.0) | 19.1 (11.3, 41.2)  | 48.0 (0, 256.5) |
| <b>45-59 mL/min/1.73 m<sup>2</sup></b> |                                               |                  |                    |                     |                                      |                  |                    |                 |
| Events, n                              | 24                                            | 11               | 9                  | 4                   | 15                                   | 7                | 5                  | 3               |
| Patients, n                            | 216                                           | 118              | 87                 | 11                  | 216                                  | 118              | 87                 | 11              |
| Unadjusted                             | 23.1 (13.9, 32.1)                             | 19.6 (8.5, 31.0) | 20.5 (8.1, 35.2)   | 94.6 (17.7, 334.5)  | 14.4 (7.5, 22.0)                     | 12.5 (3.9, 22.2) | 11.4 (2.4, 23.4)   | 70.9 (0, 269.6) |
| Adjusted <sup>a</sup>                  | 24.4 (15.0, 39.9)                             | 19.9 (8.9, 40.1) | 24.3 (10.0, 46.1)  | 72.3 (10.7, 436.9)  | 15.5 (8.2, 30.3)                     | 13.1 (4.6, 32.4) | 11.9 (2.6, 29.1)   | 88.4 (0, 490.3) |
| <b>30-44 mL/min/1.73 m<sup>2</sup></b> |                                               |                  |                    |                     |                                      |                  |                    |                 |
| Events, n                              | 26                                            | 5                | 18                 | 3                   | 15                                   | 1                | 13                 | 1               |
| Patients, n                            | 107                                           | 34               | 64                 | 9                   | 107                                  | 34               | 64                 | 9               |
| Unadjusted                             | 48.3 (30.7, 69.3)                             | 25.6 (6.1, 49.8) | 60.2 (34.2, 91.2)  | 68.5 (0, 174.8)     | 27.9 (15.0, 43.1)                    | 5.1 (0, 17.4)    | 43.5 (21.9, 70.8)  | 22.8 (0, 101.8) |
| Adjusted <sup>a</sup>                  | 49.8 (31.2, 84.4)                             | 27.7 (6.9, 66.6) | 62.8 (34.0, 119.5) | 62.5 (0, 252.0)     | 31.5 (16.6, 67.1)                    | 5.1 (0, 23.6)    | 52.7 (25.2, 144.2) | 21.6 (0, 217.2) |
| <b>15-29 mL/min/1.73 m<sup>2</sup></b> |                                               |                  |                    |                     |                                      |                  |                    |                 |
| Events, n                              | 13                                            | 1                | 8                  | 4                   | 4                                    | 0                | 2                  | 2               |
| Patients, n                            | 34                                            | 5                | 21                 | 8                   | 34                                   | 5                | 21                 | 8               |
| Unadjusted                             | 71.9 (36.7, 113.5)                            | 36.9 (0, 143.9)  | 74.9 (32.5, 131.1) | 85.4 (12.6, 216.9)  | 22.1 (4.3, 49.2)                     | 0 (0, 0)         | 18.7 (0, 49.7)     | 42.7 (0, 156.0) |
| Adjusted <sup>a</sup>                  | 53.0 (27.1, 112.3)                            | 14.6 (0, 96.2)   | 57.5 (20.0, 144.7) | 107.8 (12.2, 586.9) | 18.6 (3.5, 60.6)                     | 0 (0, 0.6)       | 15.0 (0, 55.9)     | 59.5 (0, 577.7) |

Data is presented as rate (95% confidence interval).

<sup>a</sup> Adjusted for age, sex, SES, urban residence, pre-transplant dialysis modality, dialysis duration, year of transplant, and a pre-transplant history of hypertension, diabetes mellitus, myocardial infarction, PCI or CABG surgery, heart failure, atrial fibrillation, stroke/TIA, and PVD.

For all-cause mortality and heart failure, test results for linear trend were significant across the overall eGFR categories (p=0.001) and mild albuminuria categories (p=0.004).

For death-censored heart failure, test results for linear trend were significant across albuminuria categories for eGFR category 30-44 mL/min/1.73 m<sup>2</sup> (p=0.04).

Colors represent the ranking of adjusted rates (ranked from 1 [lowest] to 12 [highest]). The categories with rank numbers 1-3 are green, 4-6 are yellow, 7-9 are orange, and 10-12 are red.<sup>1</sup> Colors reflect the KDIGO categories of risk (green: low risk; yellow: moderately increased risk; orange: high risk; red: very high risk).<sup>2</sup>

Abbreviations: CABG, coronary artery bypass graft; eGFR, estimated glomerular filtration rate; KDIGO, Kidney Disease: Improving Global Outcomes; PCI, percutaneous coronary intervention; PVD, peripheral vascular disease; SES, socio-economic status.; TIA, transient ischemic attack.

| <b>Table S1. STROBE Checklist<sup>3</sup></b> |             |                                                                                                                                                                                      |                |
|-----------------------------------------------|-------------|--------------------------------------------------------------------------------------------------------------------------------------------------------------------------------------|----------------|
|                                               | <b>Item</b> | <b>Recommendation</b>                                                                                                                                                                | <b>Section</b> |
| Title and abstract                            | 1           | (a) Indicate the study's design with a commonly used term in the title or the abstract                                                                                               | Abstract       |
|                                               |             | (b) Provide in the abstract an informative and balanced summary of what was done and what was found                                                                                  | Abstract       |
| <b>Introduction</b>                           |             |                                                                                                                                                                                      |                |
| Background/rationale                          | 2           | Explain the scientific background and rationale for the investigation being reported                                                                                                 | Introduction   |
| Objectives                                    | 3           | State specific objectives, including any prespecified hypotheses                                                                                                                     | Introduction   |
| <b>Methods</b>                                |             |                                                                                                                                                                                      |                |
| Study design                                  | 4           | Present key elements of study design early in the paper                                                                                                                              | Methods        |
| Setting                                       | 5           | Describe the setting, locations, and relevant dates, including periods of recruitment, exposure, follow-up, and data collection                                                      | Methods        |
| Participants                                  | 6           | (a) Give the eligibility criteria, and the sources and methods of selection of participants. Describe methods of follow-up                                                           | Methods        |
|                                               |             | (b) For matched studies, give matching criteria and number of exposed and unexposed                                                                                                  | Not applicable |
| Variables                                     | 7           | Clearly define all outcomes, exposures, predictors, potential confounders, and effect modifiers. Give diagnostic criteria, if applicable                                             | Methods        |
| Data sources/<br>measurement                  | 8           | For each variable of interest, give sources of data and details of methods of assessment (measurement). Describe comparability of assessment methods if there is more than one group | Methods        |
| Bias                                          | 9           | Describe any efforts to address potential sources of bias                                                                                                                            | Methods        |
| Study size                                    | 10          | Explain how the study size was arrived at                                                                                                                                            | Figure S1      |
| Quantitative variables                        | 11          | Explain how quantitative variables were handled in the analyses. If applicable, describe which groupings were chosen and why                                                         | Methods        |
| Statistical methods                           | 12          | (a) Describe all statistical methods, including those used to control for confounding                                                                                                | Methods        |
|                                               |             | (b) Describe any methods used to examine subgroups and interactions                                                                                                                  | Methods        |
|                                               |             | (c) Explain how missing data were addressed                                                                                                                                          | Methods        |
|                                               |             | (d) If applicable, explain how loss to follow-up was addressed                                                                                                                       | Methods        |
|                                               |             | (e) Describe any sensitivity analyses                                                                                                                                                | Methods        |



| <b>Table S1. STROBE checklist (continued)</b> |             |                                                                                                                                                                                                               |                                 |
|-----------------------------------------------|-------------|---------------------------------------------------------------------------------------------------------------------------------------------------------------------------------------------------------------|---------------------------------|
|                                               | <b>Item</b> | <b>Recommendation</b>                                                                                                                                                                                         | <b>Section</b>                  |
| <b>Results</b>                                |             |                                                                                                                                                                                                               |                                 |
| Participants                                  | 13          | (a) Report numbers of individuals at each stage of study—e.g. numbers potentially eligible, examined for eligibility, confirmed eligible, included in the study, completing follow-up, and analysed           | Figure S1                       |
|                                               |             | (b) Give reasons for non-participation at each stage                                                                                                                                                          | Figure S1                       |
|                                               |             | (c) Consider use of a flow diagram                                                                                                                                                                            | Figure S1                       |
| Descriptive data                              | 14          | (a) Give characteristics of study participants (e.g. demographic, clinical, social) and information on exposures and potential confounders                                                                    | Table 1                         |
|                                               |             | (b) Indicate number of participants with missing data for each variable of interest                                                                                                                           | Methods                         |
|                                               |             | (c) Summarise follow-up time (e.g. average and total amount)                                                                                                                                                  | Results                         |
| Outcome data                                  | 15          | Report numbers of outcome events or summary measures over time                                                                                                                                                | Results                         |
| Main results                                  | 16          | (a) Give unadjusted estimates and, if applicable, confounder-adjusted estimates and their precision (e.g. 95% confidence interval). Make clear which confounders were adjusted for and why they were included | Results<br>Figure 1<br>Figure 2 |
|                                               |             | (b) Report category boundaries when continuous variables were categorized                                                                                                                                     | Results                         |
|                                               |             | (c) If relevant, consider translating estimates of relative risk into absolute risk for a meaningful time period                                                                                              | Results                         |
| Other analyses                                | 17          | Report other analyses done—e.g. analyses of subgroups and interactions, and sensitivity analyses                                                                                                              | Results<br>Figure S3            |
| <b>Discussion</b>                             |             |                                                                                                                                                                                                               |                                 |
| Key results                                   | 18          | Summarise key results with reference to study objectives                                                                                                                                                      | Discussion                      |
| Limitations                                   | 19          | Discuss limitations of the study, taking into account sources of potential bias or imprecision. Discuss both direction and magnitude of any potential bias                                                    | Discussion                      |
| Interpretation                                | 20          | Give a cautious overall interpretation of results considering objectives, limitations, multiplicity of analyses, results from similar studies, and other relevant evidence                                    | Discussion                      |
| Generalisability                              | 21          | Discuss the generalisability (external validity) of the study results                                                                                                                                         | Discussion                      |
| <b>Other information</b>                      |             |                                                                                                                                                                                                               |                                 |
| Funding                                       | 22          | Give the source of funding and the role of the funders for the present study and, if applicable, for the original study on which the present article is based                                                 | Disclosures                     |

| <b>Table S2. Databases and Coding Definitions for Inclusion/Exclusion Criteria, Baseline Characteristics, and Outcome Measurements</b> |                         |                                                                                                                 |                                                                                              |
|----------------------------------------------------------------------------------------------------------------------------------------|-------------------------|-----------------------------------------------------------------------------------------------------------------|----------------------------------------------------------------------------------------------|
| <b>Variable</b>                                                                                                                        | <b>Database</b>         | <b>Codes</b>                                                                                                    |                                                                                              |
| <b>Inclusion Criteria</b>                                                                                                              |                         |                                                                                                                 |                                                                                              |
| Kidney transplantation                                                                                                                 | NARP, SARP              | Variables:<br>Modality = Transplant<br>Incident = 1<br>Numinctrans = 1<br>Transdate1 = Date of first transplant |                                                                                              |
| Laboratory investigation                                                                                                               | AKDN                    | Serum creatinine<br>Urinalysis, Albumin-creatinine ratio, Protein-creatinine ratio                              |                                                                                              |
| <b>Exclusion Criteria</b>                                                                                                              |                         |                                                                                                                 |                                                                                              |
| Kidney transplantation (prior to May 2002)                                                                                             | NARP, SARP (since 2001) | Variable: Trans2001                                                                                             |                                                                                              |
|                                                                                                                                        | AH (since 1994)         | CCI code: 1PC85<br>ICD-9-CM: 5569<br>CCP codes: 67.4, 67.59, 67.5                                               |                                                                                              |
| Other organ transplant                                                                                                                 | AH                      | Pancreas transplant                                                                                             | CCI: 10J85<br>ICD-9-CM: 528 (includes 5280, 5281, 5282, 5283, 5284, 5285, 5286)<br>CCP: 64.8 |
|                                                                                                                                        |                         | Liver transplant                                                                                                | CCI: 10A85<br>ICD-9-CM: 505 (includes 5051, 5059)<br>CCP: 62.49, 62.4                        |
|                                                                                                                                        |                         | Bowel transplant                                                                                                | CCI: 1NK85, 1NP85<br>ICD-9-CM: 4697<br>CCP: 58.99                                            |
|                                                                                                                                        |                         | Multi-visceral transplant                                                                                       | CCI: 1HY85, 1OK85<br>ICD-9-CM: 336<br>CCP: 45.6                                              |
|                                                                                                                                        |                         | Lung transplant                                                                                                 | CCI: 1GR85, 1GT85<br>ICD-9-CM: 335 (includes 3350, 3351, 3352)<br>CCP: 45.5                  |
|                                                                                                                                        |                         | Heart transplant                                                                                                | CCI: 1HZ85<br>ICD-9-CM: 3751<br>CCP: 49.5                                                    |

| <b>Table S2. Databases and Coding Definitions for Inclusion/Exclusion Criteria, Baseline Characteristics, and Outcome Measurements (continued)</b> |                 |                                                                                                                                                                                                                             |                                                                   |
|----------------------------------------------------------------------------------------------------------------------------------------------------|-----------------|-----------------------------------------------------------------------------------------------------------------------------------------------------------------------------------------------------------------------------|-------------------------------------------------------------------|
| <b>Variable</b>                                                                                                                                    | <b>Database</b> | <b>Codes</b>                                                                                                                                                                                                                |                                                                   |
| <b>Baseline Characteristics – Demographics</b>                                                                                                     |                 |                                                                                                                                                                                                                             |                                                                   |
| Age, Sex, Aboriginal, SES, Rural                                                                                                                   | AH              | Population Registry                                                                                                                                                                                                         |                                                                   |
| <b>Baseline Characteristics – Kidney-related Characteristics</b>                                                                                   |                 |                                                                                                                                                                                                                             |                                                                   |
| Dialysis modality                                                                                                                                  | NARP, SARP      | Variable: Modality = Hemodialysis, Peritoneal dialysis, Pre-care (Pre-emptive)                                                                                                                                              |                                                                   |
| Dialysis duration                                                                                                                                  | NARP, SARP      | Variable: Duration                                                                                                                                                                                                          |                                                                   |
| Site of transplantation                                                                                                                            | NARP, SARP      | Variable: Program (SARP = 0, NARP = 1)                                                                                                                                                                                      |                                                                   |
| <b>Baseline Co-morbidities</b>                                                                                                                     |                 |                                                                                                                                                                                                                             |                                                                   |
| <b>Database</b>                                                                                                                                    | <b>Codes</b>    |                                                                                                                                                                                                                             |                                                                   |
| Hypertension <sup>4</sup>                                                                                                                          | AH              | 1 hospitalization or 2 claims in 2 years or less:<br>ICD-9-CM: 401-405<br>ICD-10: I10-I13, I15                                                                                                                              | ICD-9-CM: Sn 79%, PPV 95%<br>ICD-10: Sn 68%, PPV 93% <sup>5</sup> |
| Diabetes mellitus <sup>6</sup>                                                                                                                     | AH              | 1 hospitalization or 2 claims in 2 years or less:<br>ICD-9-CM: 250<br>ICD-10: E10-E14                                                                                                                                       | ICD-9-CM: Sn 86%, PPV 80%                                         |
| Myocardial infarction <sup>7</sup>                                                                                                                 | AH              | 1 hospitalization:<br>ICD-9-CM: 410<br>ICD-10: I21, I22                                                                                                                                                                     | ICD-9-CM: Sn 89%, PPV 89%                                         |
| PCI <sup>8</sup>                                                                                                                                   | AH              | CCI: 1IJ50, 1IJ54GQAZ, 1IJ57GQ, 1IL35<br>CCP: 51.59C, 51.59D, 51.59E, 51.59F                                                                                                                                                | CCI: PPV 94-96%                                                   |
| CABG <sup>8</sup>                                                                                                                                  | AH              | CCP: 48.11, 48.12, 48.13, 48.14, 48.15, 48.19<br>CCI: 1IJ76                                                                                                                                                                 | CCI: PPV 97-98%                                                   |
| Heart failure <sup>5,9</sup>                                                                                                                       | AH              | 1 hospitalization or 2 claims in 2 years or less:<br>ICD-9-CM: 398.91, 402.01, 402.11, 402.91, 404.01, 404.03, 404.11, 404.13, 404.91, 404.93, 425.4-425.9, 428<br>ICD-10: I09.9, I25.5, I42.0, I42.5-I42.9, I43, I50       | ICD-9-CM: Sn 72%, PPV 91%<br>ICD-10: Sn 69%, PPV 90%              |
| Atrial fibrillation <sup>10</sup>                                                                                                                  | AH              | 1 hospitalization or 2 claims in 2 years or less:<br>ICD-9 CM: 427.3<br>ICD-10: I48.0                                                                                                                                       | ICD-9-CM: Sn 84%, PPV 89%                                         |
| Stroke/TIA <sup>11</sup>                                                                                                                           | AH              | 1 most responsible or post-admittance hospitalization or 1 claim or 1 most emergency department ACCS:<br>ICD-9-CM: 362.3, 430, 431, 433.x1, 434.x1, 435, 436<br>ICD-10: G45.0-G45.3, G45.8-G45.9, H34.1, I60, I61, I63, I64 | ICD-9-CM: PPV 90%<br>ICD-10: PPV 92%                              |
| PVD <sup>12</sup>                                                                                                                                  | AH              | 1 hospitalization or 1 claim or 1 ACCS:<br>ICD-9-CM: 440.2<br>ICD-10: I70.2                                                                                                                                                 | ICD-9-CM: Sn 77%, PPV 94%                                         |



| <b>Table S2. Databases and Coding Definitions for Inclusion/Exclusion Criteria, Baseline Characteristics, and Outcome Measurements (continued)</b>                                                                                                                                                                                                                                                                                                                                                                                                                                                                                                                                                                                     |                 |                                                                                                                                                                                                                                                                                                                              |
|----------------------------------------------------------------------------------------------------------------------------------------------------------------------------------------------------------------------------------------------------------------------------------------------------------------------------------------------------------------------------------------------------------------------------------------------------------------------------------------------------------------------------------------------------------------------------------------------------------------------------------------------------------------------------------------------------------------------------------------|-----------------|------------------------------------------------------------------------------------------------------------------------------------------------------------------------------------------------------------------------------------------------------------------------------------------------------------------------------|
| <b>Variable</b>                                                                                                                                                                                                                                                                                                                                                                                                                                                                                                                                                                                                                                                                                                                        | <b>Database</b> | <b>Codes</b>                                                                                                                                                                                                                                                                                                                 |
| <b>Outcomes</b>                                                                                                                                                                                                                                                                                                                                                                                                                                                                                                                                                                                                                                                                                                                        |                 |                                                                                                                                                                                                                                                                                                                              |
| Cardiovascular event                                                                                                                                                                                                                                                                                                                                                                                                                                                                                                                                                                                                                                                                                                                   | AH              | Myocardial infarction: ICD-9-CM: 410, ICD-10: I21, I22<br>PCI: CCI: 1IJ50, 1IJ54GQAZ, 1IJ57GQ, 1IL35, CCP: 51.59C, 51.59D, 51.59E, 51.59F<br>CABG: CCP: 48.11, 48.12, 48.13, 48.14, 48.15, 48.19, CCI: 1IJ76<br>Ischemic stroke: ICD-9: 434, 436, ICD-10: H34.1, I63.0, I63.1, I63.2, I63.3, I63.4, I63.5, I63.8, I63.9, I64 |
| Heart failure                                                                                                                                                                                                                                                                                                                                                                                                                                                                                                                                                                                                                                                                                                                          | AH              | ICD-9-CM: 398.91, 402.01, 402.11, 402.91, 404.01, 404.03, 404.11, 404.13, 404.91, 404.93, 425.4-425.9, 428<br>ICD-10: I09.9, I25.5, I42.0, I42.5-I42.9, I43, I50                                                                                                                                                             |
| Abbreviations: ACCS, Ambulatory Care Classification System; AH, Alberta Health; AKDN, Alberta Kidney Disease Network; CABG, coronary artery bypass graft; CCI, Canadian Classification of Health Interventions; CORR, Canadian Organ Replacement Register; ESRD, end-stage renal disease; ICD-9-CM, International Classification of Diseases, Ninth Revision, Clinical Modification; ICD-10, International Statistical Classification of Diseases, Tenth Revision; NARP, Northern Alberta Renal Program; PCI, percutaneous coronary intervention; PPV, positive predictive value; PVD, peripheral vascular disease; SARP, Southern Alberta Renal Program; SES, socio-economic status; Sn, sensitivity; TIA, transient ischemic attack. |                 |                                                                                                                                                                                                                                                                                                                              |

**Table S3. Demographic and Clinical Characteristics of Recipients at 1-Year Post-transplant by Degree of Albuminuria**

| Characteristic                                      | Overall,<br>n (%) | Albuminuria (ACR, PCR only) |                  |                  |
|-----------------------------------------------------|-------------------|-----------------------------|------------------|------------------|
|                                                     |                   | Normal                      | Mild             | Heavy            |
| <b>Recipients (n)</b>                               | 725               | 371 (51.2)                  | 314 (43.3)       | 40 (5.5)         |
| <b>Age (years)</b>                                  | 53.3 [41.8-61.9]  | 51.7 [40.5-61.4]            | 55.5 [44.2-63.0] | 49.2 [40.0-59.0] |
| >65 years                                           | 133 (18.3)        | 67 (18.1)                   | 60 (19.1)        | 6 (15.0)         |
| <b>Female sex</b>                                   | 251 (34.6)        | 125 (33.7)                  | 111 (35.4)       | 15 (37.5)        |
| <b>Aboriginal race</b>                              | 48 (6.6)          | 18 (4.9)                    | 27 (8.6)         | 3 (7.5)          |
| <b>Socio-economic status<sup>a</sup></b>            |                   |                             |                  |                  |
| Lowest                                              | 167 (23.0)        | 78 (21.0)                   | 79 (25.2)        | 10 (25.0)        |
| Middle                                              | 159 (21.9)        | 85 (22.9)                   | 64 (20.4)        | 10 (25.0)        |
| Highest                                             | 129 (17.8)        | 68 (18.3)                   | 54 (17.2)        | 7 (17.5)         |
| <b>Urban residence<sup>b</sup></b>                  | 640 (88.3)        | 333 (89.8)                  | 269 (85.7)       | 38 (95.0)        |
| <b>Pre-transplant dialysis modality<sup>c</sup></b> |                   |                             |                  |                  |
| Hemodialysis                                        | 418 (57.7)        | 211 (56.9)                  | 182 (58.0)       | 25 (62.5)        |
| Peritoneal                                          | 205 (28.3)        | 108 (29.1)                  | 88 (28.0)        | 9 (22.5)         |
| Pre-emptive                                         | 102 (14.1)        | 52 (14.0)                   | 44 (14.0)        | 6 (15.0)         |
| <b>Dialysis duration (years)</b>                    | 1.8 [0.8-3.2]     | 2.1 [1.2-3.4]               | 2.5 [1.5-3.9]    | 2.1 [1.2-3.2]    |
| <b>Northern Alberta</b>                             | 439 (60.6)        | 230 (62.0)                  | 187 (59.6)       | 22 (55.0)        |
| <b>Co-morbidities<sup>d</sup></b>                   |                   |                             |                  |                  |
| Hypertension                                        | 659 (90.9)        | 334 (90.0)                  | 285 (90.8)       | 40 (100.0)       |
| Diabetes mellitus                                   | 283 (39.0)        | 120 (32.3)                  | 140 (44.6)       | 23 (57.5)        |
| Myocardial infarction                               | 28 (3.9)          | 11 (3.0)                    | 16 (5.1)         | 1 (2.5)          |
| PCI/CABG                                            | 31 (4.3)          | 15 (4.0)                    | 16 (5.1)         | 0 (0)            |
| Heart failure                                       | 64 (8.8)          | 29 (7.8)                    | 32 (10.2)        | 3 (7.5)          |
| Atrial fibrillation                                 | 38 (5.2)          | 18 (4.9)                    | 18 (5.7)         | 2 (5.0)          |
| Stroke/TIA                                          | 21 (2.9)          | 12 (3.2)                    | 9 (2.9)          | 0 (0)            |
| Peripheral vascular disease                         | 49 (6.8)          | 21 (5.7)                    | 24 (7.6)         | 4 (10.0)         |

Data is presented as number (%) except for age and dialysis duration, which are presented as median [interquartile range].

<sup>a</sup> Income was categorized according to fifths of average neighborhood income (first quintile is the lowest and the fifth quintile is the highest).

<sup>b</sup> Urban location indicates a population >10,000 or a population >1,000 with population density >400/km<sup>2</sup>.

<sup>c</sup> Recipients identified as pre-emptive were assessed for the presence of dialysis codes and re-classified as hemodialysis (n=5) or peritoneal dialysis (n=7).

<sup>d</sup> Assessed by the presence of a diagnostic or procedural code in the 3 years prior to the index date except for hypertension and diabetes which are defined by a previously validated algorithm.<sup>4,6</sup>

Abbreviations: ACR, albumin-creatinine ratio; CABG, coronary artery bypass graft; PCI, percutaneous coronary intervention; PCR, protein-creatinine ratio; TIA, transient ischemic attack.

## References

1. Matsushita K, Ballew SH, Astor BC, et al. Cohort profile: the chronic kidney disease prognosis consortium. *Int J Epidemiol.* 2013;42:1660-8.
2. Kidney Disease: Improving Global Outcomes (KDIGO) CKD Work Group. KDIGO 2012 Clinical Practice Guideline for the Evaluation and Management of Chronic Kidney Disease. *Kidney Int Suppl.* 2013;3:1-150.
3. Von Elm E, Altman DG, Egger M, Pocock SJ, Gøtzsche PC, Vandenbroucke JP. The Strengthening of Reporting of Observational Studies in Epidemiology (STROBE) statement: guidelines for reporting observational studies. *J Clin Epidemiol.* 2008;61:344-9.
4. Quan H, Khan N, Hemmelgarn BR, et al. Validation of a case definition to define hypertension using administrative data. *Hypertension.* 2009;54:1423-8.
5. Quan H, Li B, Duncan Saunders L, et al. Assessing validity of ICD-9-CM and ICD-10 administrative data in recording clinical conditions in a unique dually coded database. *Health Serv Res.* 2008;43:1424-1441.
6. Hux JE, Ivis F, Flintoft V, Bica A. Diabetes in Ontario: determination of prevalence and incidence using a validated administrative data algorithm. *Diabetes Care.* 2002;25:512-6.
7. Austin PC, Daly PA, Tu JV. A multicenter study of the coding accuracy of hospital discharge administrative data for patients admitted to cardiac care units in Ontario. *Am Heart J.* 2002;144:290-6.
8. Lee DS, Stitt A, Wang X, et al. Administrative hospitalization database validation of cardiac procedure codes. *Med Care.* 2013;51:e22-6.
9. Quan H, Sundararajan V, Halfon P, et al. Coding algorithms for defining comorbidities in ICD-9-CM and ICD-10 administrative data. *Med Care.* 2005;43:1130-9.
10. Alonso A, Agarwal SK, Soliman EZ, et al. Incidence of atrial fibrillation in whites and African-Americans: the Atherosclerosis Risk in Communities (ARIC) study. *Am Heart J.* 2009;158:111-7.
11. Kokotailo RA, Hill MD. Coding of stroke and stroke risk factors using international classification of diseases, revisions 9 and 10. *Stroke.* 2005;36:1776-81.
12. Fan J, Arruda-Olson AM, Leibson CL, et al. Billing code algorithms to identify cases of peripheral artery disease from administrative data. *J Am Med Inform Assoc.* 2013;20:e349-54.
